# Thermal Detection Thresholds of A $\delta$ - and C-Fibre Afferents Activated by Brief CO<sub>2</sub> Laser Pulses Applied onto the Human Hairy Skin

Maxim Churyukanov<sup>1,2,3</sup>, Léon Plaghki<sup>1</sup>, Valéry Legrain<sup>4</sup>, André Mouraux<sup>1\*</sup>

**1** Institute of Neuroscience (IONS), Université catholique de Louvain, Brussels, Belgium, **2** Department of Nervous Diseases, The I.M. Sechenov First Moscow State Medical University, Moscow, Russia, **3** Laboratory of Pathophysiology of Pain, Institute of General Pathology and Pathophysiology RAMS, Moscow, Russia, **4** Department of Experimental Clinical and Health Psychology, Ghent University, Ghent, Belgium

## Abstract

Brief high-power laser pulses applied onto the hairy skin of the distal end of a limb generate a double sensation related to the activation of A $\delta$ - and C-fibres, referred to as first and second pain. However, neurophysiological and behavioural responses related to the activation of C-fibres can be studied reliably only if the concomitant activation of A $\delta$ -fibres is avoided. Here, using a novel CO<sub>2</sub> laser stimulator able to deliver constant-temperature heat pulses through a feedback regulation of laser power by an online measurement of skin temperature at target site, combined with an adaptive staircase algorithm using reaction-time to distinguish between responses triggered by A $\delta$ - and C-fibre input, we show that it is possible to estimate robustly and independently the thermal detection thresholds of A $\delta$ -fibres ( $46.9 \pm 1.7^\circ\text{C}$ ) and C-fibres ( $39.8 \pm 1.7^\circ\text{C}$ ). Furthermore, we show that both thresholds are dependent on the skin temperature preceding and/or surrounding the test stimulus, indicating that the A $\delta$ - and C-fibre afferents triggering the behavioural responses to brief laser pulses behave, at least partially, as detectors of a change in skin temperature rather than as pure level detectors. Most importantly, our results show that the difference in threshold between A $\delta$ - and C-fibre afferents activated by brief laser pulses can be exploited to activate C-fibres selectively and reliably, provided that the rise in skin temperature generated by the laser stimulator is well-controlled. Our approach could constitute a tool to explore, in humans, the physiological and pathophysiological mechanisms involved in processing C- and A $\delta$ -fibre input, respectively.

**Citation:** Churyukanov M, Plaghki L, Legrain V, Mouraux A (2012) Thermal Detection Thresholds of A $\delta$ - and C-Fibre Afferents Activated by Brief CO<sub>2</sub> Laser Pulses Applied onto the Human Hairy Skin. PLoS ONE 7(4): e35817. doi:10.1371/journal.pone.0035817

**Editor:** Wael El-Deredy, University of Manchester, United Kingdom

**Received:** September 27, 2011; **Accepted:** March 27, 2012; **Published:** April 25, 2012

**Copyright:** © 2012 Churyukanov et al. This is an open-access article distributed under the terms of the Creative Commons Attribution License, which permits unrestricted use, distribution, and reproduction in any medium, provided the original author and source are credited.

**Funding:** MC acknowledges support from the bursary of President of the Russian Federation for an internship abroad. VL is a fellow of the Research Foundation Flanders, Belgium (FWO). AM acknowledges support from the IASP Early Career Research Grant, and from a Marie Curie European Reintegration Grant (ERG). The funders had no role in study design, data collection and analysis, decision to publish, or preparation of the manuscript.

**Competing Interests:** The authors have declared that no competing interests exist.

\* E-mail: andre.mouraux@uclouvain.be

## Introduction

For the past 30 years, investigators have relied extensively on infrared laser stimulators to study nociception and pain perception in humans [1–4]. Indeed, as a source of radiant heat applied onto the skin, infrared lasers can be used to activate heat-sensitive A $\delta$ - and C-fibre afferents selectively. Most importantly, because of their very high power output, infrared lasers can generate the very steep heating ramps required to elicit time-locked responses such as reaction-times and event-related brain potentials [5], and are thus well suited to study the human nociceptive system.

However, for reasons that remain a matter of debate, brain responses related to the activation of C-fibres can be identified only if the concomitant activation of A $\delta$ -fibres is avoided [6–8]. Therefore, in humans, the current research has focussed almost exclusively on characterizing the neural processes triggered by A $\delta$ -fibre input, simply because of the lack of reliable methods to study the responses triggered by the selective activation of C-fibres. Hence, to progress in our understanding of the physiology and pathophysiology of nociception, developing means to study the signals ascending through C-fibres is essential [9].

Based on characteristics differentiating A $\delta$ - and C-fibres, several methods have been proposed to activate C-fibre afferents selectively [5]. A first method exploits the fact that unmyelinated C-fibres are more resistant to pressure than myelinated A-fibres, and consists in applying prolonged force against a peripheral nerve such as to block selectively the nerve conduction of A-fibres [10,11]. A second method takes advantage of the fact that the distribution density of C-fibres in the epidermis is greater than that of A $\delta$ -fibres, and consists in using a very small stimulation surface area to elicit isolated C-fibre responses [12,13]. Indeed, Ochoa et al. [14] estimated a 1/4 ratio between A $\delta$ - and C-fibres in a human peripheral sensory nerve, suggesting that the intraepidermal density of C-fibres is greater than that of A $\delta$ -fibres. However, because of the lack of histological staining methods to differentiate between A $\delta$ - and C-fibre free nerve endings in the epidermis, their actual respective distribution remains to be established. A third method uses the difference in the thermal activation thresholds of A $\delta$ - and C-fibre afferents, and consists in heating the skin above the threshold of C-fibres, but below the threshold of A $\delta$ -fibres [15]. However, all of these methods are technically challenging to implement, and the results they yield are often unreliable. Hence,

at present, their use as a routine clinical diagnostic tool is not conceivable [9].

Here, we propose the basis for a robust approach to estimate the thermal detection thresholds of heat-sensitive A $\delta$ - and C-fibre afferents, using a new CO<sub>2</sub> laser stimulator able to deliver constant-temperature heat pulses through a feedback regulation of laser power by an online measurement of skin temperature at target site, combined with an adaptive psychophysical algorithm using reaction-times as criterion to distinguish between responses triggered by A $\delta$ - and C-fibre input. Furthermore, we show that the difference between C- and A $\delta$ -fibre thresholds can be exploited to activate C-fibre afferents selectively and reliably, provided that the temperature of the eliciting stimulus is well controlled. By providing a unique mean to characterize the neural activity triggered by C-fibre input in humans, for example, through the recording of ultra-late C-fibre event-related brain potentials, our approach could constitute an interesting tool to study the contribution of C-fibres to both physiological and pathological pain.

## Methods

### Participants

Nine healthy participants (3 females; 8 right-handed, aged 24–35 years) took part in the study. Before the experiment, they were familiarized with the experimental setup and task. Experimental procedures were approved by the Ethics Committee of the Université catholique de Louvain (B40320096449). Written informed consent was obtained from participants.

### CO<sub>2</sub> laser stimulation of A $\delta$ - and C-fibre afferents

Thermal stimuli were applied to the dorsum of the non-dominant hand, using a new CO<sub>2</sub> laser stimulator whose power is regulated using a feedback control based on an online measurement of skin temperature at the site of stimulation (Laser Stimulation Device, SIFEC, Belgium). The device is commercially available, and approved for medical use. Conception of the laser was inspired by the temperature-controlled laser stimulator proposed by Meyer et al. [16]. Both devices are based on a closed-loop control of laser power by an online monitoring of skin temperature performed using a radiometer collinear with the laser beam. As compared to the device proposed by Meyer et al. [16], the present device integrates some improvements provided by recent technical progress. The most important difference is the very small lag in the feedback control. Therefore, by sampling the fast-adapting output of the radiometer at a rate of 500 Hz, it is possible to achieve temperature steps with much greater rise rates. For example, in Magerl et al. [15], heating ramps were approximately 50°C/s and, consequently, the time required to bring the skin temperature from baseline to a temperature supraliminal for A $\delta$ -nociceptors was approximately 150 ms. In contrast, the present stimulator is able to reach similar target temperatures in less than 10 ms, and is thus better suited to record and interpret time-locked responses such as reaction-times and event-related potentials [17]. The heat source is a 25 W radio-frequency excited CO<sub>2</sub> laser (Synrad 48-2; Synrad, USA). Power control is achieved by pulse width modulation (PWM) at 5 KHz clock frequency. Stimuli are delivered through a 10 m optical fibre. By vibrating this fibre at some distance from the source, a quasi-uniform spatial distribution of radiative power within the stimulated area is obtained. At the end of the fibre, optics collimate the beam, resulting in a 6-mm beam diameter at target site. Using this system, thermal stimulation profiles were defined as follows (Figure 1A).

**Baseline skin temperature (T<sub>0</sub>).** Prior to the actual stimulus, the skin temperature was measured for 1000 ms without delivering any laser energy, such as to obtain an estimate of the baseline skin temperature (average of 500 successive measures of skin temperature, sampled at a rate of 500 Hz).

**Conditioning skin temperature (T<sub>1</sub>).** To examine whether A $\delta$ - and C-fibre thermal detection thresholds were dependent on the skin temperature immediately preceding the stimulus, three different conditioning temperatures were used: *unchanged*, 34°C, and 38°C. In the *unchanged* condition, no laser energy was delivered during this 3-second time-interval and the skin temperature of the stimulated area was thus unchanged. In the other two conditions, the skin temperature of the stimulated area was raised to either 34°C or 38°C using a 1-second linear heating-ramp. This conditioning temperature was maintained for 2 seconds before applying the target stimulus.

**Target skin temperature (T<sub>2</sub>).** The skin temperature of the stimulated area was raised briefly to a defined target temperature using a very steep 10-ms heating ramp, and was maintained at that temperature for another 40 ms. As detailed in the next section, possible target skin temperatures ranged from 33°C to 51°C, in steps of 1°C.

Finally, the skin temperature was measured for an additional 2 seconds without delivering any laser energy.

After each trial, the target of the laser was displaced to a random position on the hand dorsum, in order to avoid nociceptor sensitization and/or habituation. The time interval between two consecutive trials varied randomly between 5 and 10 seconds.

### Procedure

Stimuli were delivered and detection thresholds were estimated by means of a staircase algorithm (Figure 1B–D).

Participants were asked to respond as quickly as possibly by pressing a button held in the dominant hand when perceiving the target stimulus (T<sub>2</sub>). Reaction time latencies were used to discriminate between detections triggered by C-fibre input and detections triggered by A $\delta$ -fibre input. This is justified by the fact that the nerve conduction velocity of unmyelinated C-fibres is much slower than the nerve conduction velocity of myelinated A $\delta$ -fibres ( $\pm 1$  m/s vs.  $\pm 10$  m/s; [8,11,18–20]). Taking into account the peripheral conduction distance of afferent input originating from the hand, and taking into account the distribution of reaction times to laser stimuli after blocking the conduction of myelinated fibres [10,11], a criterion of 650 ms was chosen to discriminate between C-fibre responses (reaction time  $\geq 650$  ms) and A $\delta$ -fibre responses (reaction time  $< 650$  ms) [11,20]. Additional evidence that reaction-times can be used to distinguish between A $\delta$ - and C-fibre responses is provided by Opsommer et al. [21], showing that the time interval between the two peaks of the bimodal distribution of reaction-times increases with peripheral distance. As shown in Figure 2, this criterion effectively discriminated the two response categories.

Because the thermal activation threshold of C-fibres is known to be lower than the thermal activation threshold of A $\delta$ -fibres [11,18], it was expected that the skin temperature required to elicit A $\delta$ -fibre responses would be higher than the skin temperature required to elicit C-fibre responses.

**C-fibre thermal detection threshold.** A staircase using detection vs. no detection as criterion, regardless of reaction-time, was used to determine the absolute detection threshold. This threshold is expected to reflect the C-fibre threshold, provided that the C-fibre threshold is lower than the A $\delta$ -fibre threshold.

## A. thermal stimulation profiles

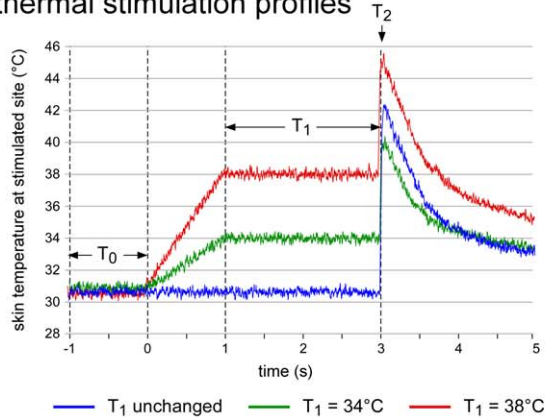B. conditioning temperature :  $T_1$  = unchanged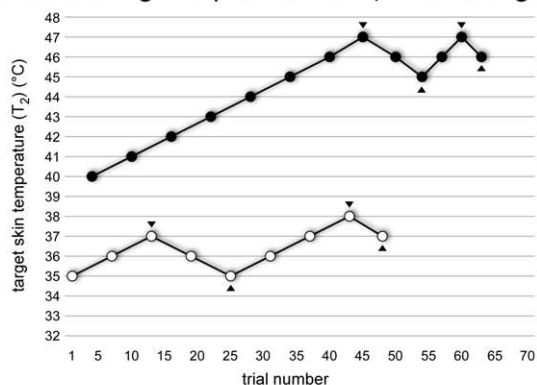C. conditioning temperature :  $T_1$  = 34°C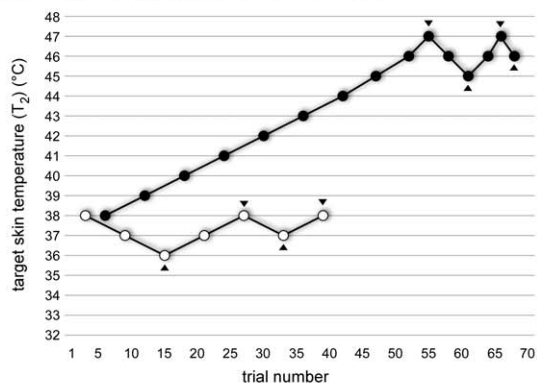D. conditioning temperature :  $T_1$  = 38°C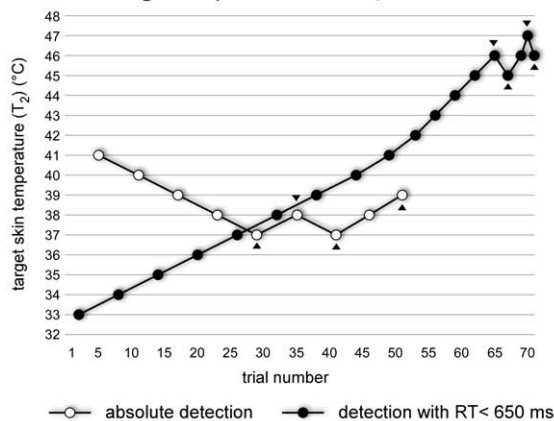

**Figure 1. Experimental paradigm.** A. Thermal stimuli were applied to the dorsum of the non-dominant hand using a CO<sub>2</sub> laser (beam diameter: 6 mm). The data shown corresponds to an actual measurement of skin temperature performed by the radiometer in three different trials (x-axis: time; y-axis: skin temperature). After measuring the baseline skin temperature for one second ( $T_0$ ), the stimulated area was raised to the conditioning skin temperature using a 1-s heating ramp and was maintained at that temperature for 2 seconds ( $T_1$ ). Three different conditioning skin temperatures were used:  $T_1$ =unchanged (blue),  $T_1$ =34°C (green) and (c)  $T_1$ =38°C (red). Following this conditioning of the stimulated area, the test stimulus ( $T_2$ ) was applied, consisting of a 10-ms heating ramp followed by a 40-ms plateau. B–D: The staircase procedure used to estimate A $\delta$ - and C-fibre thresholds (one subject shown as example). Participants were asked to respond as quickly as possible by pressing a button held in the dominant hand when perceiving the test stimulus ( $T_2$ ). Reaction times were used to discriminate between responses triggered by C-fibre input (reaction-time  $\geq 650$  ms) and responses triggered by A $\delta$ -fibre input (reaction-time  $< 650$  ms). For all three conditions (Panel B:  $T_1$ =unchanged, Panel C:  $T_1$ =34°C and Panel D:  $T_1$ =38°C), an adaptive staircase algorithm was used to estimate (1) the absolute detection threshold assumed to reflect the detection threshold of C-fibre input and (2) the detection threshold of responses with a reaction-time  $< 650$  ms assumed to reflect the detection threshold of A $\delta$ -fibre input. The six staircases required for this procedure were presented in an interleaved fashion, such as to avoid order effects related to habituation and/or sensitization as well as a possible response bias due to anticipation. doi:10.1371/journal.pone.0035817.g001

**A $\delta$ -fibre thermal detection threshold.** A staircase using detection with a reaction-time  $< 650$  ms as criterion was used to determine the A $\delta$ -fibre thermal detection threshold. Indeed, as shown in Figure 2, such reaction-times are compatible only with the greater conduction velocity of myelinated A $\delta$ -fibres.

For both staircase algorithms, the temperature of the first stimulus of the staircase was set randomly to a value ranging between 32 and 41°C. The temperature of each of the following test stimuli was determined by whether the participant's response to the preceding stimulus met the defined detection criterion. If the preceding stimulus was detected, the temperature of the upcoming stimulus was decreased by 1°C; else, it was increased by 1°C. Hence, the staircase converged towards the skin temperature at which the probability of detecting the stimulus with the defined criterion was 50%.

A $\delta$ - and C-fibre thresholds were estimated for each of the three conditions ( $T_1$ =unchanged,  $T_1$ =34°C, and  $T_1$ =38°C). As shown in the right panel of Figure 1, the six staircases required to estimate the two thresholds for each of the three conditions were presented in an interleaved fashion. This procedure avoided any order effect on the estimated thresholds that could have been induced by habituation and/or sensitization if the staircases had been presented in separate successive blocks. Furthermore, the interleaving procedure ensured that participants were unable to predict the temperature of the upcoming stimulus, and unable to understand the relationship between their response and the temperature of the upcoming stimuli, thus preventing any response bias by anticipation.

Each staircase was interrupted after the occurrence of four staircase reversals (i.e. when the current stimulus was detected and the preceding stimulus undetected, or when the current stimulus was undetected and the preceding stimulus detected). Threshold values were then obtained by averaging the target stimulus temperatures  $T_2$  at which the four staircase reversals had occurred.

## Results

## Baseline skin temperature

Across subjects, the baseline skin temperature of the hand dorsum, averaged across all trials, ranged from 28.5°C to 33.6°C ( $31.2 \pm 1.7^\circ\text{C}$ , group-level mean  $\pm$  SD).

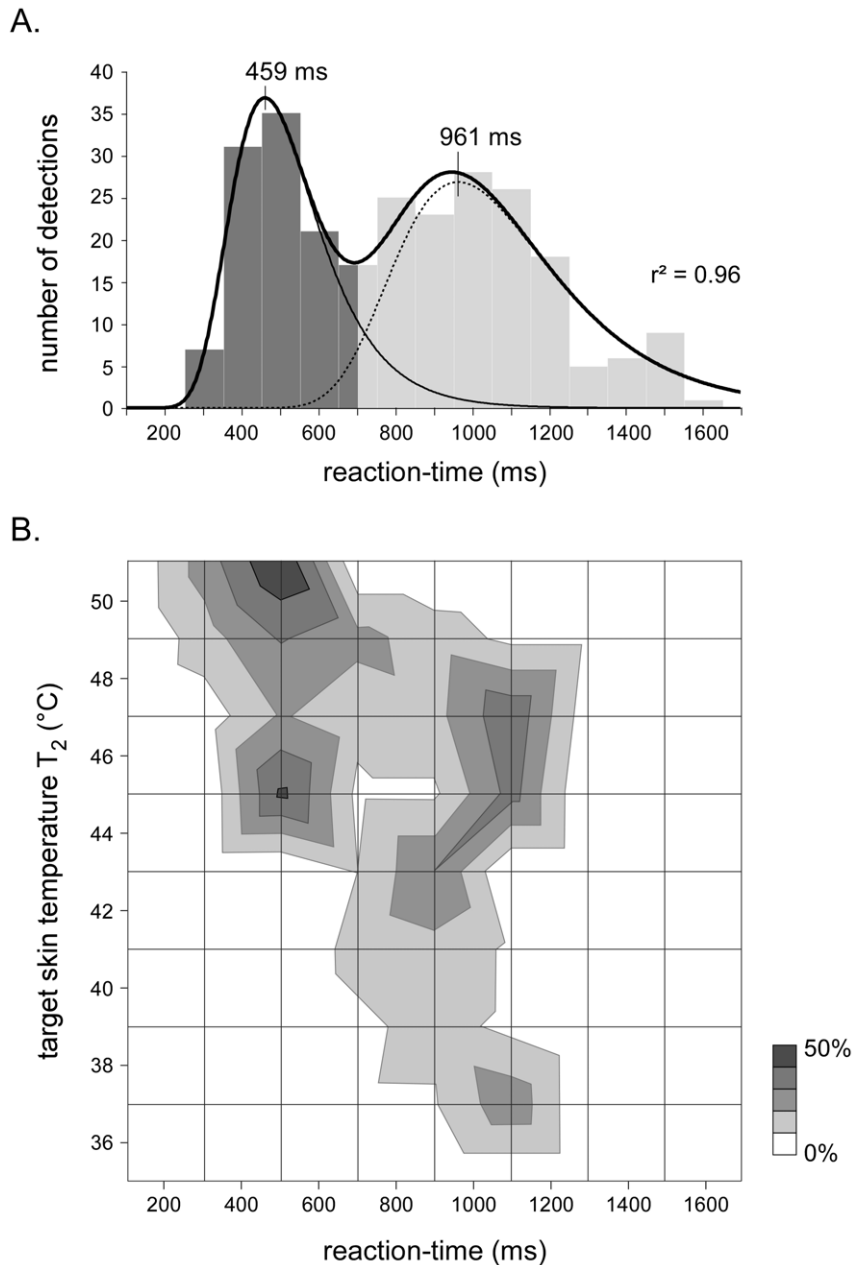

**Figure 2. Frequency distribution of the reaction-times to brief CO<sub>2</sub> laser pulses applied onto the dorsum of the non-dominant hand using target skin temperatures ranging from 35 to 51°C.** The upper panel shows the overall distribution of reaction-times regardless of the target skin temperature ( $T_2$ ). The lower panel shows the distribution of reaction-times as a function of  $T_2$ . Note the bimodal distribution of reaction-times, related to the fact that lower target skin temperatures triggered late-latency detections compatible with the conduction velocity of unmyelinated C-fibres, whereas higher target skin temperatures triggered early-latency detections compatible with the conduction velocity of myelinated A $\delta$ -fibres (at higher skin temperatures, the stimulus activated both A $\delta$ - and C-fiber afferents, but detections were related to the first-arriving A $\delta$ -fiber afferent volley). The bimodal nature of this distribution was confirmed by comparing the fitting of the data to a model describing a unimodal vs. a bimodal distribution of sensory-motor responses (see Results). The first function of the bimodal model characterized the distribution of the short-latency A $\delta$ -fiber responses ( $a=459$  ms;  $b=111$  ms). The second function characterized the distribution of the late-latency C-fiber responses ( $a=961$  ms;  $b=202$  ms).

doi:10.1371/journal.pone.0035817.g002

### Reaction times

As shown in Figure 2, and as predicted by previous results (e.g. [10–12,21,22]), the frequency distribution of reaction-times appeared bimodal, and the arbitrarily-defined cut-off to discriminate between A $\delta$ -fiber (reaction-time <650 ms) and C-fiber (reaction-time  $\geq$ 650 ms) responses effectively separated the two response categories.

The bimodal nature of this distribution was confirmed by comparing directly the fitting of the data to a model describing a unimodal distribution vs. the fitting of the data to a model describing a bimodal distribution. For this purpose, the distribution of reaction-times was modelled using an asymmetrical function proposed by Zaitsev and Skorik [23], shown to describe well the right-skewed distribution of sensory-motor responses:





unchanged conditioning skin temperature ( $T_1$ )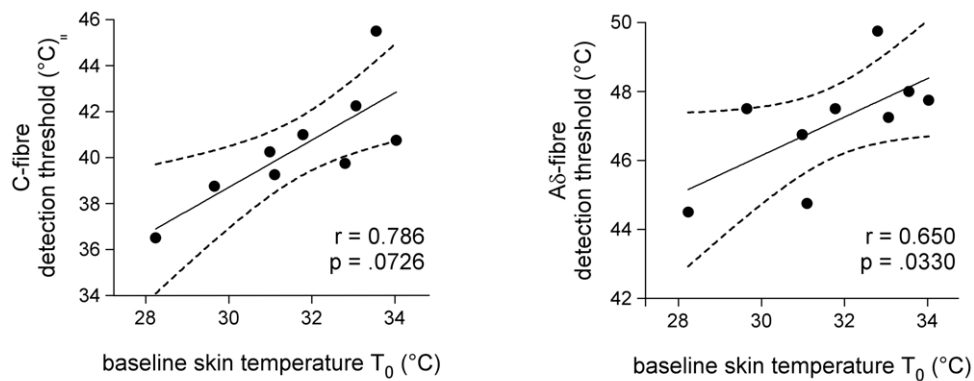34 $^{\circ}\text{C}$  conditioning skin temperature ( $T_1$ )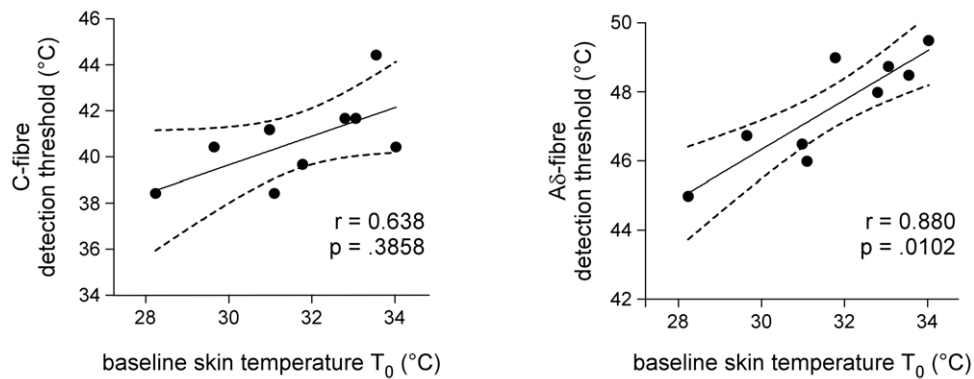38 $^{\circ}\text{C}$  conditioning skin temperature ( $T_1$ )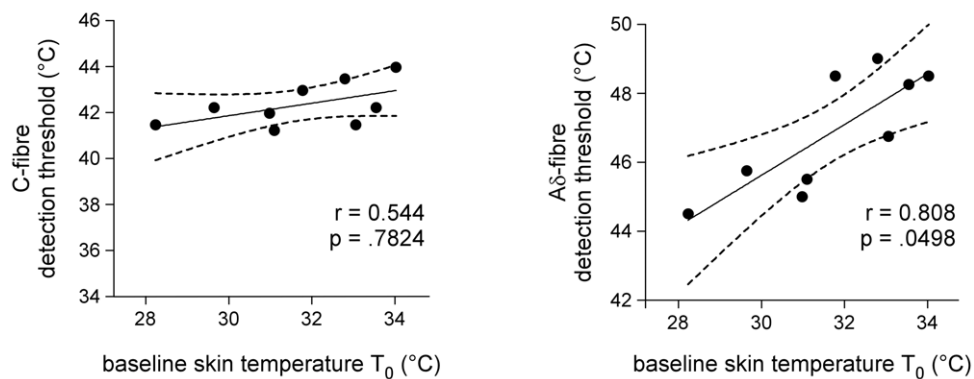

**Figure 5. Correlation between baseline skin temperature ( $T_0$ ) measured immediately before trial onset and the thermal detection threshold of the behavioural responses triggered by A $\delta$ - and C-fibre input, in each of the three experimental conditions ( $T_1$  = unchanged,  $T_1$  = 34 $^{\circ}\text{C}$  and  $T_1$  = 38 $^{\circ}\text{C}$ ) (Pearson's correlation coefficient, two-tailed p-values, adjusted for six comparisons using the Bonferroni correction). Note the positive relationship between baseline skin temperature ( $T_0$ ) and the A $\delta$ -fibre threshold, in particular, when the stimulated area was brought for two seconds to  $T_1$  = 34 $^{\circ}\text{C}$  and  $T_1$  = 38 $^{\circ}\text{C}$  prior to applying the test stimulus.**

doi:10.1371/journal.pone.0035817.g005



18. Bromm B, Treede RD (1984) Nerve fibre discharges, cerebral potentials and sensations induced by CO<sub>2</sub> laser stimulation. *Hum Neurobiol* 3: 33–40.
19. Bjerring P, Arendt-Nielsen L (1988) Argon laser induced single cortical responses: a new method to quantify pre-pain and pain perceptions. *J Neurol Neurosurg Psychiatry* 51: 43–49.
20. Mouraux A, Guerit JM, Plaghki L (2003) Non-phase locked electroencephalogram (EEG) responses to CO<sub>2</sub> laser skin stimulations may reflect central interactions between A $\delta$ - and C-fibre afferent volleys. *Clin Neurophysiol* 114: 710–722.
21. Opsommer E, Masquelier E, Plaghki L (1999) Determination of nerve conduction velocity of C-fibres in humans from thermal thresholds to contact heat (thermode) and from evoked brain potentials to radiant heat (CO<sub>2</sub> laser). *Neurophysiol Clin* 29: 411–422.
22. Campbell JN, LaMotte RH (1983) Latency to detection of first pain. *Brain Res* 266: 203–208.
23. Zaitsev AV, Skorik YA (2002) Mathematical description of sensorimotor reaction time distribution. *Human Physiology* 28: 494–497.
24. Hammel HT, Hardy JD, Murgatroyd D (1956) Spectral transmittance and reflectance of excised human skin. *J Appl Physiol* 9: 257–264.
25. Hallin RG, Torebjork HE, Wiesenfeld Z (1982) Nociceptors and warm receptors innervated by C fibres in human skin. *J Neurol Neurosurg Psychiatry* 45: 313–319.
26. LaMotte RH, Campbell JN (1978) Comparison of responses of warm and nociceptive C-fiber afferents in monkey with human judgments of thermal pain. *J Neurophysiol* 41: 509–528.
27. Darian-Smith I, Johnson KO, LaMotte C, Kenins P, Shigenaga Y, et al. (1979) Coding of incremental changes in skin temperature by single warm fibers in the monkey. *J Neurophysiol* 42: 1316–1331.
28. Darian-Smith I, Johnson KO, LaMotte C, Shigenaga Y, Kenins P, et al. (1979) Warm fibers innervating palmar and digital skin of the monkey: responses to thermal stimuli. *J Neurophysiol* 42: 1297–1315.
29. Johnson KO, Darian-Smith I, LaMotte C, Johnson B, Oldfield S (1979) Coding of incremental changes in skin temperature by a population of warm fibers in the monkey: correlation with intensity discrimination in man. *J Neurophysiol* 42: 1332–1353.
30. Meyer RA, Campbell JN (1981) Evidence for two distinct classes of unmyelinated nociceptive afferents in monkey. *Brain Res* 224: 149–152.
31. Plaghki L, Decruynaere C, Van Dooren P, Le Bars D (2010) The fine tuning of pain thresholds: a sophisticated double alarm system. *PLoS ONE* 5: e10269.
32. Peng YB, Kenshalo DR, Gracely RH (2003) Periaqueductal gray-evoked dorsal root reflex is frequency dependent. *Brain Res* 976: 217–226.
33. Hardy JD, Goodell H, Wolff HG (1951) The influence of skin temperature upon the pain threshold as evoked by thermal radiation. *Science* 114: 149–150.
34. Meyer RA, Campbell JN (1981) Myelinated nociceptive afferents account for the hyperalgesia that follows a burn to the hand. *Science* 213: 1527–1529.
35. Treede RD, Meyer RA, Raja SN, Campbell JN (1995) Evidence for two different heat transduction mechanisms in nociceptive primary afferents innervating monkey skin. *J Physiol* 483(Pt 3): 747–758.
